# Supplementary material for: Facile one-pot synthesis of mulberry-shape silver nanoparticle-doped porphyrin nanoassembly with self-promoted electrochemiluminescence
Source: Royal Society of Chemistry journal article supplement (doi:10.1039/d4nj00417e), 2024-01-01
Supplement: d4nj00417e1.pdf [file d4nj00417e1.pdf]

## Supporting Information

# Facile one-pot synthesis of mulberry-shape silver nanoparticles-doped porphyrin nanoassembly with self-promoted electrochemiluminescence

*Yisha Wang, Jiangnan Shu\*, Linfeng Zhuo, Manli Wang, Wei Nie and Hua Cui\**

Key Laboratory of Precision and Intelligent Chemistry, iChEM (Collaborative Innovation Center of Chemistry for Energy Materials), Department of Chemistry, University of Science and Technology of China, Hefei, Anhui 230026, P. R. China

\*E-mail: [hcui@ustc.edu.cn](mailto:hcui@ustc.edu.cn); [jiangnan@ustc.edu.cn](mailto:jiangnan@ustc.edu.cn).

---

## Table of Contents

|                                                                                      |    |
|--------------------------------------------------------------------------------------|----|
| S1. Apparatus .....                                                                  | 3  |
| S2. Size distribution of AgNPs in AgNPs@TCPP nanoassembly .....                      | 4  |
| S3. SAED ring pattern .....                                                          | 5  |
| S4. Deconvolution XPS spectra of N 1s in TCPP and AgNPs@TCPP nanoassembly..          | 6  |
| S5. UV-vis absorption spectra of TCPP and AgNPs@TCPP nanoassembly .....              | 7  |
| S6. UV-vis absorption spectrum of Ag nanoseeds .....                                 | 8  |
| S7. Effect of AgNO <sub>3</sub> amount on synthesis of AgNPs@TCPP nanoassembly ..... | 9  |
| S8. Effect of growth time on synthesis of AgNPs@TCPP nanoassembly .....              | 10 |
| S9. Preparation of SDS-TCPP aggregate and CTAB-TCPP aggregate .....                  | 11 |
| S10. Characterization of SDS-TCPP aggregate and CTAB-TCPP aggregate .....            | 12 |
| S11. Calculation of ECL efficiency .....                                             | 13 |
| S12. EIS of TCPP and AgNPs@TCPP nanoassembly modified GCE .....                      | 14 |
| References .....                                                                     | 15 |

---

## S1. Apparatus

The materials were characterized by scanning electron microscope (SEM) (Zeiss, Germany), transmission electron microscopy (TEM) (Hitachi-7650, Japan), energy dispersive spectroscopy (EDS)-mapping (Talos F200X, Thermo Fisher Scientific), X-ray photoelectron spectroscopy (XPS) (Thermo ESCALAB 250Xi) with Al K $\alpha$  radiation as the X-ray source), Fourier transform infrared spectrophotometer (FT-IR spectrophotometer, EQUINX55, Broker, Germany) and UV-visible (UV-vis) absorption spectrophotometer (Agilent 8453, USA).

Electrochemiluminescence (ECL) experiments were carried out using a homemade ECL system, including an H-type electrochemical cell, a CHI 760D electrochemistry workstation (Chenhua, China) and an RFL-1 luminometer (Ruimai, China) equipped with a CR-105 photomultiplier tube (PMT) (Bingsong, China). ECL spectra were obtained with a homemade ECL spectrum acquiring system consisting of a CHI 760D electrochemical workstation (Chenhua, China), a spectrometer (SpectraPro HRS-300, Teledyne Princeton Instruments, USA) and an EMCCD (Newton, Andor Technology, UK). Electrochemical impedance spectroscopy (EIS) experiments were carried out by a CHI 760D electrochemistry workstation (Chenhua, China).

---

S2. Size distribution of AgNPs in AgNPs@TCPP nanoassembly

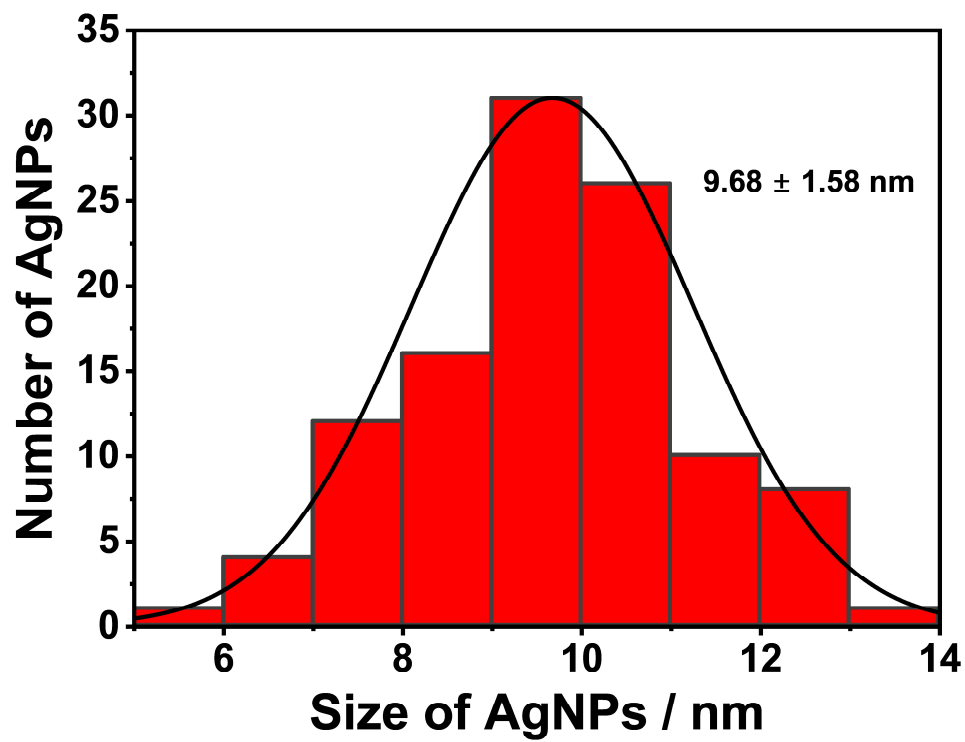

Figure S1. Size distribution of AgNPs in AgNPs@TCPP nanoassembly.

---

### S3. SAED ring pattern

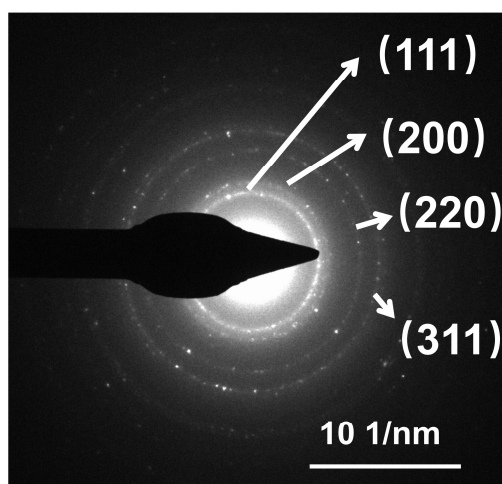

**Figure S2.** Selected area electron diffraction (SAED) ring pattern of AgNPs in AgNPs@TCPP nanoassembly.

---

#### S4. Deconvolution XPS spectra of N 1s in TCPP and AgNPs@TCPP nanoassembly

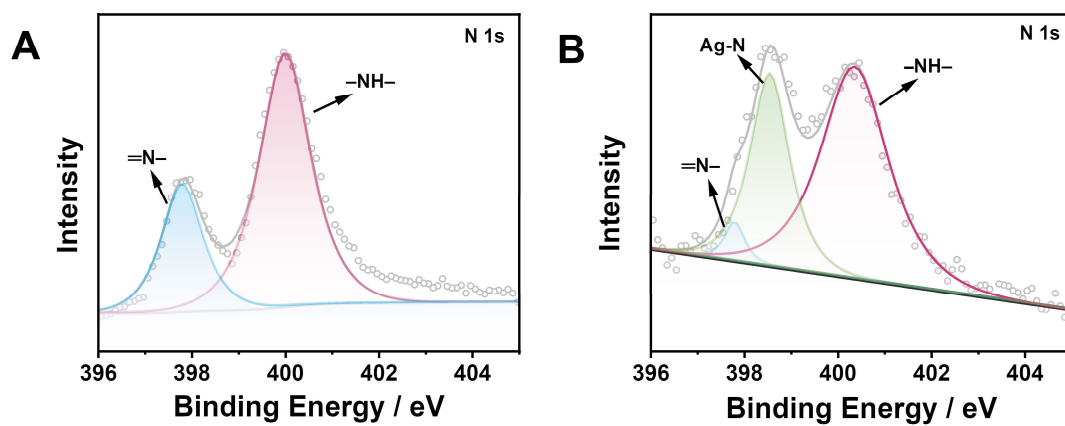

**Figure S3.** Deconvolution XPS spectra of N 1s in (A) TCPP and (B) AgNPs@TCPP nanoassembly.

---

S5. UV-vis absorption spectra of TCPP and AgNPs@TCPP nanoassembly

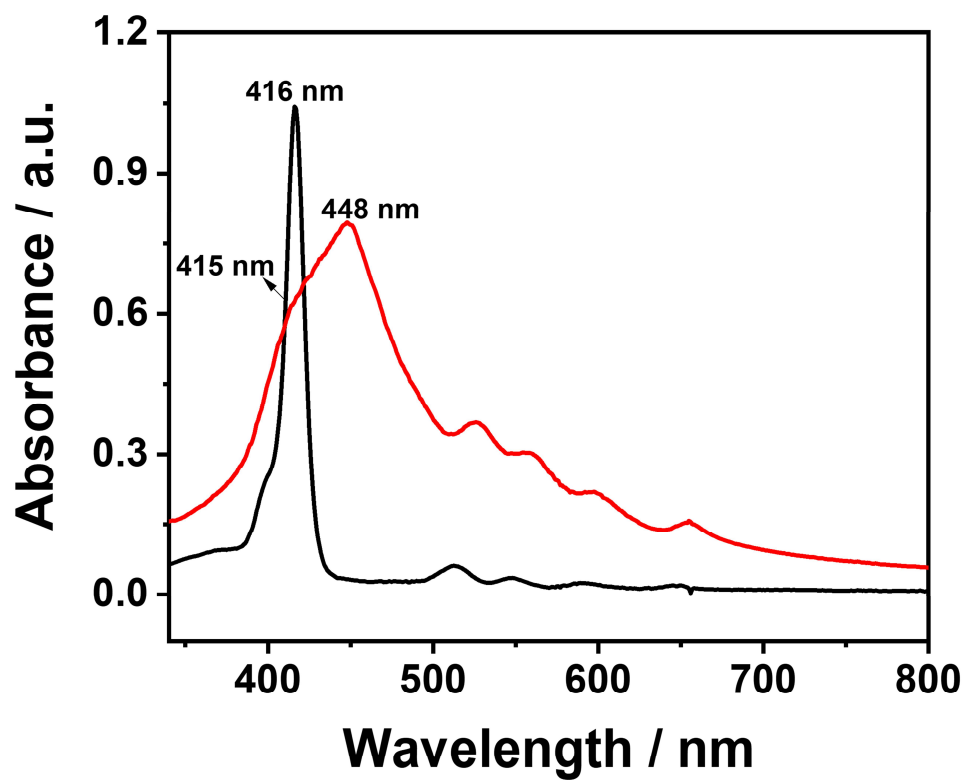

Figure S4. UV-vis absorption spectra of TCPP (black curve) and AgNPs@TCPP nanoassembly (red curve).

---

**S6. UV-vis absorption spectrum of Ag nanoseeds**

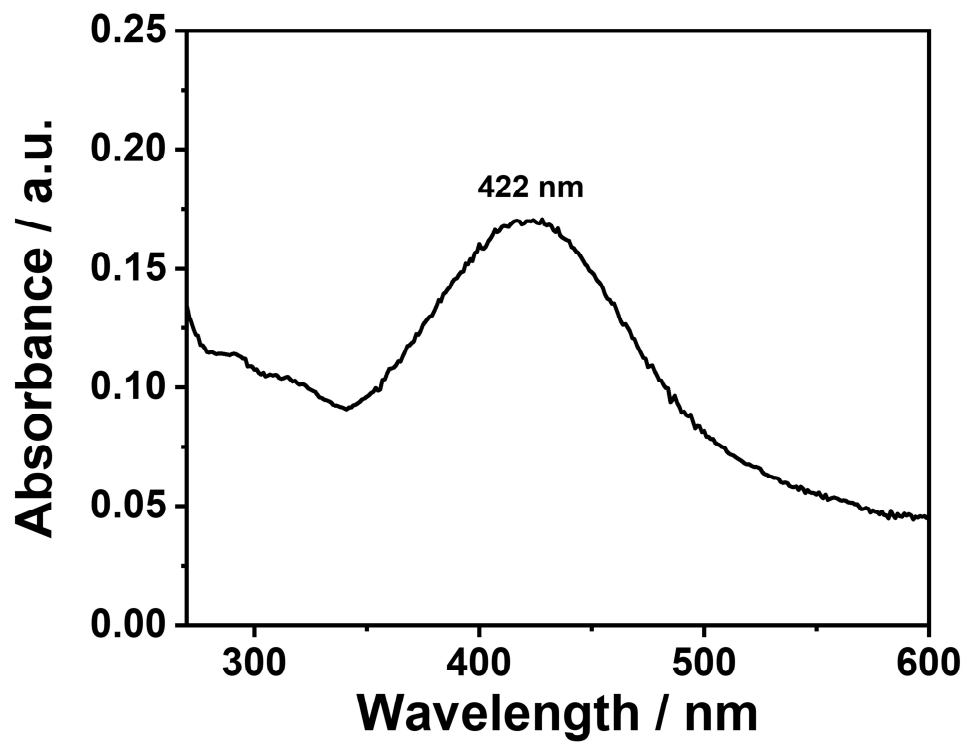

**Figure S5.** UV-vis absorption spectrum of Ag nanoseeds.



---

**S7. Effect of AgNO<sub>3</sub> amount on synthesis of AgNPs@TCPP nanoassembly**

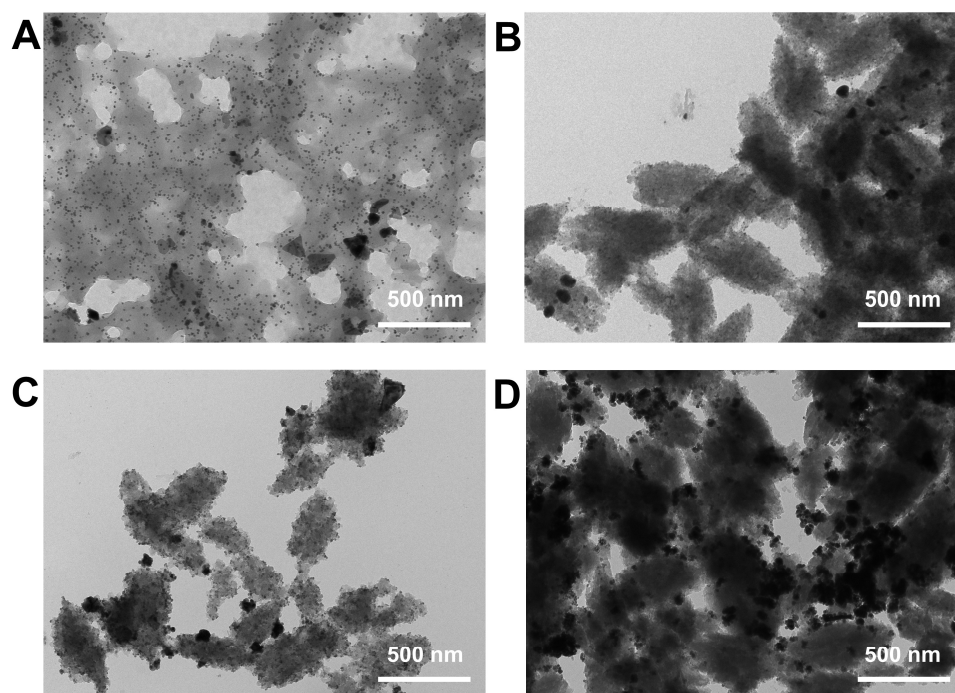

**Figure S6.** TEM images of AgNPs@TCPP nanoassembly with different amount of AgNO<sub>3</sub>. (A) 2.5 mg, (B) 5 mg, (C) 10 mg and (D) 30 mg.

---

**S8. Effect of growth time on synthesis of AgNPs@TCPP nanoassembly**

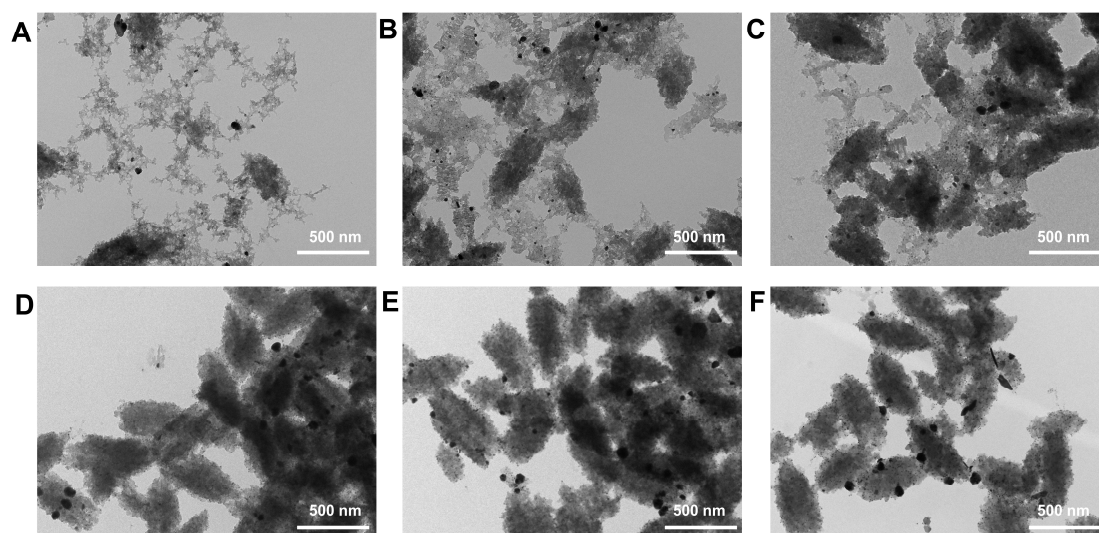

**Figure S7.** TEM images of AgNPs@TCPP nanoassembly with different growth times. (A) 2 min, (B) 7 min, (C) 11 min, (D) 16 min, (E) 20 min and (F) 25 min.

---

## **S9. Preparation of SDS-TCPP aggregate and CTAB-TCPP aggregate**

The preparation of the surfactant-assisted TCPP aggregates was partially referred the previous reports.<sup>1</sup> Taking sodium dodecyl sulfate-assisted TCPP aggregate (SDS-TCPP aggregate) as an example, 4 mg of TCPP was dissolved in 0.5 mL of 0.2 M NaOH solution, and 0.01 M SDS was dissolved in 9.5 mL of 0.01 M HCl solution. Then, the TCPP solution was injected into the SDS solution and triggered the self-assembly of TCPP into ordered aggregates through noncovalent interactions including  $\pi$ - $\pi$  stacking and hydrophobic-hydrophobic interactions. With continuous stirring for 48 h at room temperature, SDS-TCPP aggregate was obtained and purified by centrifugation. Using the same procedures, cetyltrimethylammonium bromide-assisted TCPP aggregate (CTAB-TCPP aggregate) was prepared.

---

## S10. Characterization of SDS-TCPP aggregate and CTAB-TCPP aggregate

As displayed in Figure S8A, the TEM image of SDS-TCPP aggregate showed a uniform rod-like structure with 200 nm in length and 20 nm in width. The CTAB-TCPP aggregate (Figure S8B) exhibited a slightly larger rod-like structure of 350 nm in length and 50 nm in width. The results showed the successful synthesis of SDS-TCPP aggregate and CTAB-TCPP aggregate.

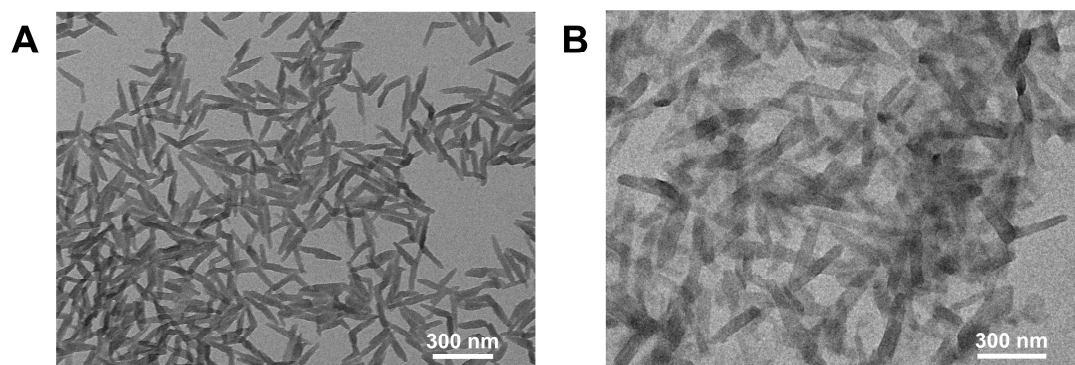

**Figure S8.** TEM images of (A) SDS-TCPP aggregate and (B) CTAB-TCPP aggregate.

---

### S11. Calculation of ECL efficiency

To estimate the relative ECL efficiency ( $\Phi_{ECL}$ ), the ECL intensity and current with potentiostatic method of AgNPs@TCPP nanoassembly, SDS-TCPP aggregate and CTAB-TCPP aggregate in the presence of 0.02 M  $K_2S_2O_8$ , were compared to that of 0.1 mM  $Ru(bpy)_3^{2+}$  with the same coreactant. The electrode was applied with the potential of -1.5 V for 8 s.  $\Phi_{ECL}$  was calculated with the following equation S1:

$$\Phi_{ECL} = \left\{ \frac{\int ECL dt}{\int Current dt} \right\}_x / \left\{ \frac{\int ECL dt}{\int Current dt} \right\}_{st} \times 100\% \quad (S1)$$

where “ECL” and “Current” represent ECL intensity and electrochemical current values, respectively, “st” refers to the  $Ru(bpy)_3^{2+}/K_2S_2O_8$  standard and “x” refers to the AgNPs@TCPP nanoassembly, SDS-TCPP aggregate or CTAB-TCPP aggregate.

**Table S1.** ECL efficiency of TCPP luminophores.

|              | AgNPs@TCPP<br>nanoassembly | SDS-TCPP<br>aggregate | CTAB-TCPP<br>aggregate |
|--------------|----------------------------|-----------------------|------------------------|
| $\Phi_{ECL}$ | 217%                       | 92.3%                 | 57.5%                  |

---

S12. EIS of TCPP and AgNPs@TCPP nanoassembly modified GCE

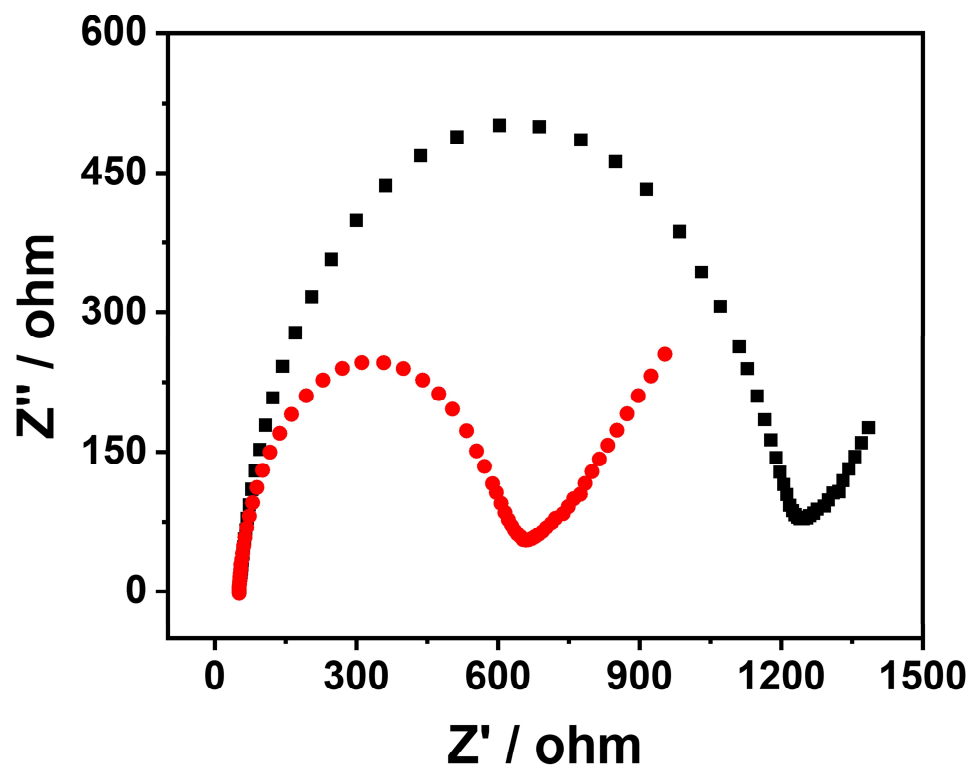

**Figure S9.** EIS of TCPP (black sign) and AgNPs@TCPP nanoassembly (red sign) modified GCE in 0.2 M KCl solution containing 5 mM  $[\text{Fe}(\text{CN})_6]^{4-/3-}$ .

---

## References

1. Q. Han, C. Wang, Z. Li, J. Wu, P. k. Liu, F. Mo and Y. Fu, *Analytical Chemistry*, 2020, **92**, 3324-3331.
